# Supplementary material for: Tailored fabrication of iridium nanoparticle-sensitized titanium oxynitride nanotubes for solar-driven water splitting: experimental insights on the photocatalytic–activity–defects relationship
Source: Royal Society of Chemistry journal article supplement (doi:10.1039/c9cy02366f), 2019-12-19
Supplement: c9cy02366f1.pdf [file c9cy02366f1.pdf]

Supporting information

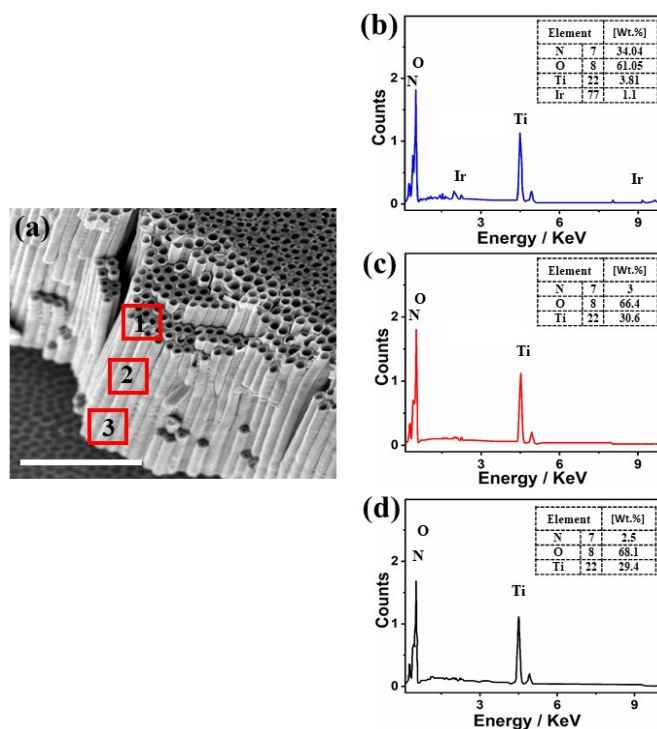

**Figure S1.** (a) SEM image of typically synthesized Ir/TiON-NTs and its correlated EDX analysis (b-d) at different numbered areas (1-3) in (a), respectively. The indicated scale bar in (a) is 1  $\mu\text{m}$ .

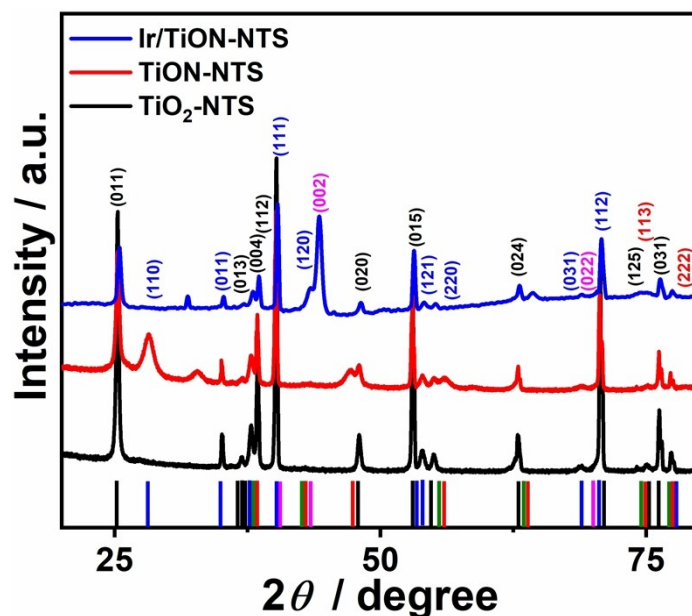

**Figure S2.** The wide-angle XRD diffraction patterns of typically synthesized NTs. The indicated lines at the bottom were taken from ICSD database. This is including black lines for anatase (ICSD:172914), blue lines for rutile (ICSD:33838), green lines for TiN (ICSD:236801) and red lines for TiON (ICSD:426340), and magenta lines for Iridium nanoparticles (ICSD:426948).

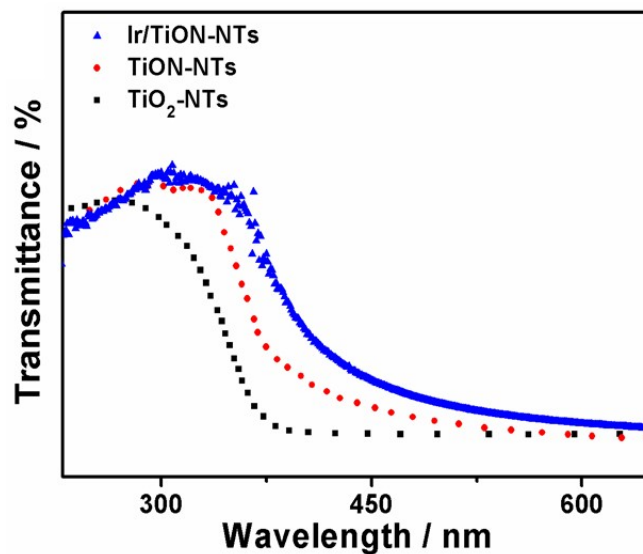

**Figure S3.** UV-Vis diffuse reflectance spectroscopy measurements of the as-formed materials

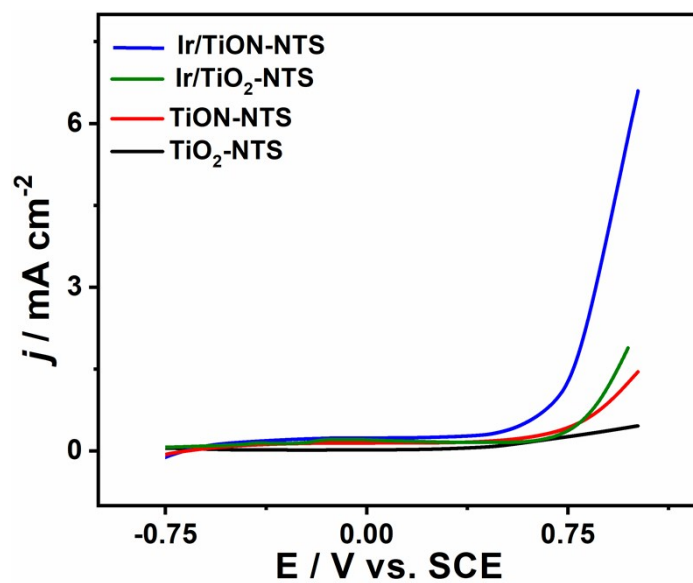

**Figure S4.** LSV measured on the typically prepared materials benchmarked in an aqueous solution of 0.1 M KOH at a scan rate of 10 mV s<sup>-1</sup> at room temperature under dark.

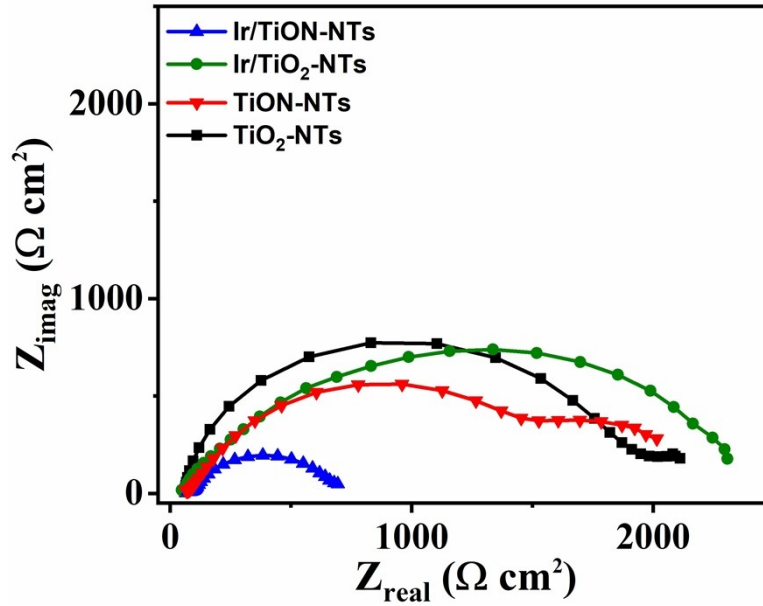

**Figure S5.** EIS measured on the typically prepared materials benchmarked in an aqueous solution of 0.1 M KOH in a frequency range from 100 kHz to 5 Hz with an AC voltage amplitude of 0.8 V room temperature under light.

#### Mott-Schottky analysis

The Mott-Schottky analysis plot of the as-made materials was measured at 100 Hz in the potential range ranged from -1 V to +0.5 V. The charge distribution at the protective layer/electrolyte is usually determined based on Mott-Schottky relationship by measuring electrode capacitance  $C$ , as a function of electrode potential  $E$ , and assuming that the contribution of the double layer capacitance and the presence of surface states can be neglected

$$C^{-2} = \frac{2}{e\epsilon\epsilon_0 N_d} \left( E - E_{FB} - \frac{K_b T}{e} \right) \quad (1)$$

where  $e$  is the electron charge ( $1.60 \times 10^{-19}$  coulombs),  $\epsilon$  is the dielectric constant,  $\epsilon_0$  the permittivity of vacuum ( $8.854 \times 10^{-12}$  F/m),  $N_d$  is the donor density ( $\text{cm}^{-3}$ ),  $E_{FB}$  is the flat band potential,  $K_b$  is the Boltzmann constant ( $1.38 \times 10^{-23}$  J/K) and  $T$  is the absolute temperature<sup>3, 4</sup>. From Equation  $N_d$  can be determined from the slope of the experimental  $1/C^2$  versus  $E$  plots, and  $E_{fb}$  from the extrapolation of the linear portion to  $1/C^2 = 0$ .

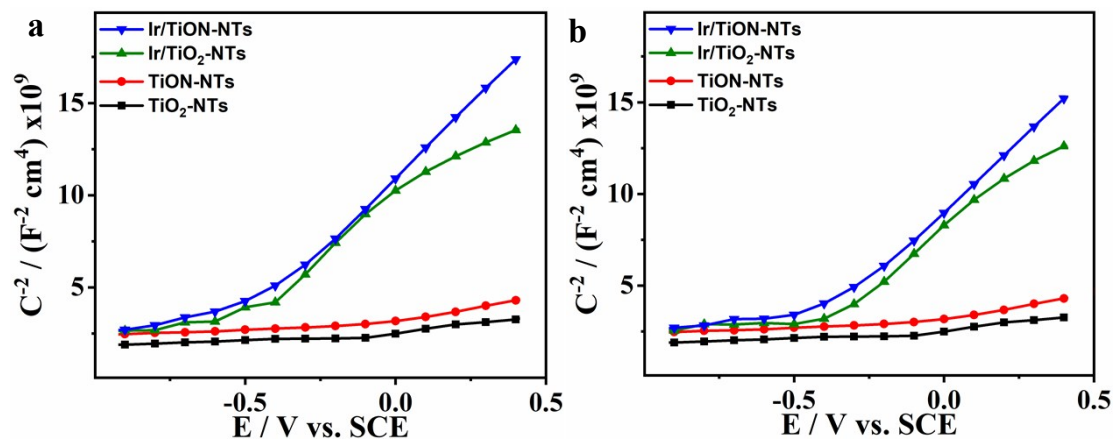

**Figure S6.** Mott-Schottky plot of the typically prepared materials benchmarked in an aqueous solution of 0.1 M KOH in a potential range from -1 to 0.5 V vs SCE at 100 Hz frequency a) dark and b) light.
